# Supplementary material for: Measuring Personality through Images: Validating a Forced-Choice Image-Based Assessment of the Big Five Personality Traits
Source: MDPI journal article supplement (doi:10.3390/jintelligence10010012), 2022-02-07
Supplement: s1 [file s1]

Table S1. Cohen's  $d$  values and Lasso coefficients for the 300 items (150 image pairs) retained in study 1.

| Mapped trait(s) | N respondents selecting |         | Cohen's $d$ |       |       |       |       | Image retained in model |      |      |      |      |
|-----------------|-------------------------|---------|-------------|-------|-------|-------|-------|-------------------------|------|------|------|------|
|                 | Image 1                 | Image 2 | O           | C     | E     | A     | N     | O                       | C    | E    | A    | ES   |
| O               | 183                     | 249     | -0.69       | 0.00  | -0.17 | -0.39 | -0.13 | 1                       |      | 1, 2 |      |      |
| A/ES            | 249                     | 180     | 0.34        | 0.03  | 0.27  | 0.54  | -0.30 | 1                       |      |      | 1    |      |
| C/A             | 193                     | 237     | -0.21       | 0.31  | -0.37 | -0.27 | 0.32  | 1                       |      |      |      |      |
| ES              | 189                     | 240     | -0.21       | -0.17 | -0.72 | 0.00  | 0.73  | 1                       |      |      |      |      |
| O/C             | 179                     | 252     | 0.48        | -0.21 | 0.56  | -0.21 | -0.35 | 1                       |      |      |      |      |
| O               | 104                     | 325     | -0.76       | 0.31  | -0.33 | -0.35 | 0.12  | 2                       |      |      |      |      |
| O               | 325                     | 105     | 0.83        | -0.23 | 0.36  | -0.25 | -0.24 | 2                       |      |      |      |      |
| O               | 209                     | 222     | -0.54       | -0.37 | 0.22  | 0.06  | 0.10  | 2                       |      |      |      |      |
| C/ES            | 144                     | 284     | -0.26       | -0.20 | -0.60 | -0.24 | 0.57  | 2                       |      |      |      |      |
| A/ES            | 242                     | 189     | -0.09       | 0.19  | -0.43 | -0.43 | 0.27  | 1, 2                    |      |      |      |      |
| ES/C            | 243                     | 188     | 0.16        | -0.46 | -0.33 | -0.37 | 0.34  | 1, 2                    |      |      |      |      |
| A               | 144                     | 285     | -0.14       | -0.85 | 0.42  | -1.03 | -0.01 |                         | 1    |      | 2    | 1    |
| E               | 78                      | 352     | -0.29       | -0.66 | -0.94 | 0.27  | 0.50  |                         | 1    |      |      |      |
| C               | 281                     | 147     | -0.04       | 1.51  | 0.27  | 0.04  | -0.54 |                         | 1    |      |      |      |
| O               | 314                     | 116     | 0.57        | 0.33  | -0.06 | 0.20  | -0.41 |                         | 1    |      |      |      |
| C               | 189                     | 240     | 0.31        | -0.91 | -0.93 | 0.11  | 0.75  |                         | 2    | 2    | 2    | 1    |
| ES              | 263                     | 166     | 0.30        | 0.30  | 1.07  | 0.18  | -0.77 |                         | 2    |      |      | 2    |
| O/C             | 206                     | 224     | 0.92        | -0.42 | -0.05 | -0.13 | 0.24  |                         | 2    |      |      | 2    |
| E               | 131                     | 297     | -0.34       | -0.30 | -0.94 | 0.00  | 0.47  |                         | 2    |      |      |      |
| C               | 320                     | 111     | -0.30       | 0.61  | 0.22  | 0.09  | -0.65 |                         | 2    |      |      |      |
| O/ES            | 175                     | 256     | 0.34        | -0.39 | 0.55  | 0.17  | -0.56 |                         | 2    |      |      |      |
| A               | 323                     | 107     | 0.24        | 0.59  | 0.66  | 0.76  | -0.24 |                         | 1, 2 | 1, 2 | 1, 2 |      |
| ES              | 158                     | 273     | 0.08        | -0.51 | -0.71 | 0.12  | 0.84  |                         | 1, 2 | 1, 2 |      | 1, 2 |
| C               | 267                     | 165     | 0.10        | 0.81  | 0.49  | -0.18 | -0.59 |                         | 1, 2 |      |      | 1, 2 |

| Mapped trait(s) | N respondents selecting |         | Cohen's $d$ (based on study one) |       |       |       |       | Image retained in model |      |      |   |     |
|-----------------|-------------------------|---------|----------------------------------|-------|-------|-------|-------|-------------------------|------|------|---|-----|
|                 | Image 1                 | Image 2 | O                                | C     | E     | A     | N     | O                       | C    | E    | A | ES  |
| C               | 273                     | 158     | 0.07                             | 0.77  | -0.10 | 0.57  | -0.06 |                         | 1, 2 |      |   |     |
| C               | 132                     | 299     | 0.14                             | -0.75 | -0.01 | -0.59 | 0.05  |                         | 1, 2 |      |   |     |
| C               | 205                     | 226     | 0.12                             | -0.86 | -0.24 | 0.03  | 0.31  |                         | 1, 2 |      |   |     |
| C               | 220                     | 210     | 0.22                             | -0.74 | 0.41  | -0.61 | -0.05 |                         | 1, 2 |      |   |     |
| E/C             | 176                     | 255     | 0.19                             | -0.39 | 0.34  | -0.18 | -0.19 |                         | 1, 2 |      |   |     |
| ES              | 180                     | 248     | -0.32                            | -0.38 | -0.86 | -0.07 | 0.76  |                         |      | 1    |   | 2   |
| ES/O            | 265                     | 164     | -0.47                            | -0.13 | 0.14  | -0.15 | 0.25  |                         |      | 1    |   |     |
| E               | 248                     | 182     | -0.15                            | -0.34 | -1.00 | 0.15  | 0.43  |                         |      | 1    |   |     |
| E               | 207                     | 223     | -0.02                            | 0.14  | 1.19  | 0.27  | -0.59 |                         |      | 2    |   | 2   |
| E               | 241                     | 188     | 0.03                             | 0.53  | -0.85 | 0.51  | 0.11  |                         |      | 2    |   | 2   |
| C/ES            | 238                     | 191     | -0.12                            | -0.22 | -0.95 | -0.24 | 0.75  |                         |      | 2    |   | 2   |
| E               | 259                     | 171     | -0.38                            | -0.48 | -1.27 | -0.02 | 0.83  |                         |      | 2    |   |     |
| E               | 243                     | 187     | -0.14                            | -0.28 | -1.14 | -0.13 | 0.57  |                         |      | 2    |   |     |
| O/E             | 211                     | 220     | 0.31                             | -0.21 | -1.17 | -0.31 | 0.44  |                         |      | 2    |   |     |
| O/ES            | 243                     | 188     | -0.28                            | 0.01  | -0.76 | 0.25  | 0.61  |                         |      | 1, 2 |   | 1,2 |
| O               | 54                      | 377     | 0.59                             | -0.26 | -0.27 | -1.77 | 0.51  |                         |      | 1, 2 |   |     |
| C/E             | 299                     | 132     | -0.17                            | 0.33  | -0.72 | 0.27  | -0.19 |                         |      | 1, 2 |   |     |
| C/E             | 157                     | 273     | -0.01                            | -0.35 | 0.50  | -0.62 | -0.30 |                         |      | 1, 2 |   |     |
| O/ES            | 202                     | 229     | 0.43                             | 0.05  | 0.53  | -0.30 | -0.49 |                         |      | 1, 2 |   |     |
| E/C             | 141                     | 289     | -0.05                            | -0.22 | 0.72  | -0.39 | -0.27 |                         |      | 1, 2 |   |     |
| O/ES            | 161                     | 270     | 0.33                             | -0.02 | 1.35  | -0.54 | -0.93 |                         |      | 1, 2 |   |     |
| E/O             | 174                     | 257     | -0.43                            | -0.02 | 0.97  | 0.09  | -0.31 |                         |      | 1, 2 |   |     |
| O               | 104                     | 328     | -0.78                            | -0.72 | -0.39 | -0.74 | 0.05  |                         |      |      | 1 |     |
| O/E             | 222                     | 207     | 0.71                             | 0.24  | -0.29 | 0.48  | 0.01  |                         |      |      | 1 |     |
| O/A             | 91                      | 339     | 0.25                             | 0.07  | -0.22 | -0.71 | 0.22  |                         |      |      | 1 |     |
| A               | 73                      | 358     | -0.53                            | -0.42 | 0.21  | -1.36 | -0.28 |                         |      |      | 1 |     |

| Mapped trait(s) | N respondents selecting |         | Cohen's $d$ (based on study one) |       |       |       |       | Image retained in model |   |   |      |     |
|-----------------|-------------------------|---------|----------------------------------|-------|-------|-------|-------|-------------------------|---|---|------|-----|
|                 | Image 1                 | Image 2 | O                                | C     | E     | A     | N     | O                       | C | E | A    | ES  |
| A               | 346                     | 84      | -0.04                            | 0.68  | -0.01 | 0.67  | 0.11  |                         |   |   | 1    |     |
| A/C             | 239                     | 191     | 0.24                             | -0.85 | 0.24  | 0.55  | 0.13  |                         |   |   | 1    |     |
| E/ES            | 155                     | 277     | 0.18                             | 0.00  | 0.73  | -0.19 | -1.28 |                         |   |   | 1    |     |
| C               | 364                     | 66      | 0.27                             | 1.34  | 0.25  | 0.39  | -0.19 |                         |   |   | 2    |     |
| E/A             | 143                     | 287     | -0.17                            | 0.14  | 0.47  | -0.65 | -0.49 |                         |   |   | 2    |     |
| E/C             | 172                     | 257     | -0.18                            | -0.73 | 0.47  | -0.40 | 0.06  |                         |   |   | 2    |     |
| O               | 112                     | 318     | -0.54                            | -0.04 | -0.43 | -0.48 | 0.34  |                         |   |   | 1, 2 |     |
| A               | 344                     | 86      | 0.35                             | -0.01 | 0.02  | 1.09  | 0.01  |                         |   |   | 1, 2 |     |
| A/E             | 343                     | 88      | -0.59                            | -0.07 | -0.39 | 0.82  | 0.07  |                         |   |   | 1, 2 |     |
| O/ES            | 140                     | 291     | 0.34                             | 0.26  | -0.28 | -0.12 | -0.36 |                         |   |   | 1, 2 |     |
| A/C             | 204                     | 225     | 0.38                             | -0.59 | -0.20 | 0.21  | 0.49  |                         |   |   |      | 1   |
| ES              | 164                     | 265     | -0.11                            | -0.49 | -0.61 | 0.06  | 1.11  |                         |   |   |      | 2   |
| ES              | 164                     | 267     | -0.23                            | -0.36 | -0.76 | 0.21  | 0.73  |                         |   |   |      | 1,2 |
| ES              | 278                     | 153     | -0.36                            | -0.39 | -0.76 | 0.04  | 0.69  |                         |   |   |      | 1,2 |
| A               | 289                     | 143     | 0.13                             | -0.21 | -0.37 | -0.52 | 0.29  |                         |   |   |      | 1,2 |
| ES              | 266                     | 165     | -0.03                            | 0.16  | 0.43  | 0.00  | -1.01 |                         |   |   |      | 1,2 |
| E/O             | 285                     | 145     | -0.54                            | 0.03  | 0.44  | 0.02  | -0.37 |                         |   |   |      | 1,2 |
| E/A             | 194                     | 236     | -0.13                            | 0.18  | 0.60  | -0.36 | -0.79 |                         |   |   |      | 1,2 |
| A/O             | 281                     | 149     | -0.40                            | 0.28  | 0.10  | 0.39  | 0.16  |                         |   |   |      | 1,2 |
| ES              | 328                     | 104     | 0.19                             | -0.02 | -0.49 | 0.31  | 0.71  |                         |   |   |      |     |
| A               | 328                     | 101     | 0.17                             | 0.71  | -0.33 | 0.63  | 0.11  |                         |   |   |      |     |
| A               | 342                     | 89      | 0.57                             | 0.59  | 0.70  | 0.58  | -0.72 |                         |   |   |      |     |
| A               | 71                      | 359     | -0.24                            | -0.79 | 0.48  | -0.61 | -0.11 |                         |   |   |      |     |
| A               | 364                     | 65      | -0.22                            | 0.31  | -0.13 | 0.97  | -0.19 |                         |   |   |      |     |
| A               | 359                     | 70      | 0.34                             | 0.68  | 0.48  | 0.53  | -0.71 |                         |   |   |      |     |
| E/ES            | 172                     | 257     | -0.05                            | -0.04 | 0.47  | 0.13  | -0.40 |                         |   |   |      |     |

| Mapped trait(s) | N respondents selecting |         | Cohen's $d$ (based on study one) |       |       |       |       | Image retained in model |   |   |   |    |
|-----------------|-------------------------|---------|----------------------------------|-------|-------|-------|-------|-------------------------|---|---|---|----|
|                 | Image 1                 | Image 2 | O                                | C     | E     | A     | N     | O                       | C | E | A | ES |
| E/ES            | 253                     | 179     | -0.22                            | 0.06  | -0.61 | 0.01  | 0.61  |                         |   |   |   |    |
| E/A             | 130                     | 301     | -0.13                            | -0.17 | 0.54  | -0.41 | -0.50 |                         |   |   |   |    |
| ES/C            | 90                      | 341     | -0.20                            | -0.53 | -0.81 | -0.63 | 0.76  |                         |   |   |   |    |
| E/ES            | 262                     | 169     | -0.35                            | 0.16  | 0.73  | 0.23  | -0.44 |                         |   |   |   |    |
| E/O             | 224                     | 208     | -0.62                            | 0.02  | 0.49  | -0.06 | 0.25  |                         |   |   |   |    |
| A/ES            | 177                     | 253     | 0.16                             | 0.00  | 0.61  | 0.28  | -0.43 |                         |   |   |   |    |
| O/A             | 198                     | 233     | 0.39                             | -0.16 | -0.17 | -0.39 | 0.21  |                         |   |   |   |    |
| O/E             | 167                     | 263     | 0.64                             | -0.08 | -0.24 | -0.05 | 0.14  |                         |   |   |   |    |
| A/ES            | 222                     | 209     | 0.24                             | 0.39  | -0.29 | 0.24  | -0.58 |                         |   |   |   |    |
| A/ES            | 182                     | 249     | -0.02                            | -0.37 | -0.35 | -0.49 | 0.24  |                         |   |   |   |    |
| C/ES            | 171                     | 258     | 0.03                             | 0.49  | 0.23  | 0.13  | -0.37 |                         |   |   |   |    |
| ES/C            | 254                     | 177     | -0.10                            | -0.31 | -0.43 | 0.09  | 0.45  |                         |   |   |   |    |
| A/C             | 173                     | 258     | 0.29                             | -0.45 | 0.15  | 0.22  | -0.06 |                         |   |   |   |    |
| O               | 47                      | 382     | -0.57                            | -0.54 | -0.69 | -0.27 | 0.51  |                         |   |   |   |    |
| C               | 281                     | 148     | 0.02                             | 1.06  | 0.47  | 0.19  | -0.62 |                         |   |   |   |    |
| A               | 178                     | 253     | 0.21                             | -0.30 | 0.30  | -0.55 | -0.50 |                         |   |   |   |    |
| O               | 108                     | 323     | -0.51                            | 0.35  | -0.25 | 0.24  | -0.18 |                         |   |   |   |    |
| C               | 98                      | 333     | 0.03                             | -0.82 | -0.14 | -0.40 | 0.03  |                         |   |   |   |    |
| O               | 109                     | 321     | 0.54                             | 0.10  | 0.21  | -0.04 | -0.13 |                         |   |   |   |    |
| C               | 193                     | 239     | 0.42                             | 0.72  | -0.04 | 0.38  | 0.23  |                         |   |   |   |    |
| E               | 225                     | 206     | -0.13                            | -0.38 | -1.12 | -0.43 | 0.51  |                         |   |   |   |    |
| E               | 312                     | 120     | -0.27                            | -0.13 | -0.87 | 0.04  | 0.29  |                         |   |   |   |    |
| E               | 292                     | 138     | 0.19                             | 0.39  | 1.08  | 0.14  | -0.83 |                         |   |   |   |    |
| E               | 226                     | 202     | 0.20                             | -0.09 | 1.00  | 0.08  | -0.49 |                         |   |   |   |    |
| O               | 264                     | 166     | -0.48                            | -0.35 | -0.66 | 0.02  | 0.49  |                         |   |   |   |    |
| E               | 197                     | 233     | 0.11                             | -0.29 | -1.13 | -0.12 | 0.67  |                         |   |   |   |    |

| Mapped trait(s) | N respondents selecting |         | Cohen's $d$ (based on study one) |       |       |       |       | Image retained in model |   |   |   |    |
|-----------------|-------------------------|---------|----------------------------------|-------|-------|-------|-------|-------------------------|---|---|---|----|
|                 | Image 1                 | Image 2 | O                                | C     | E     | A     | N     | O                       | C | E | A | ES |
| C               | 354                     | 75      | -0.44                            | 0.96  | -0.81 | 0.52  | 0.04  |                         |   |   |   |    |
| E               | 224                     | 208     | 0.17                             | -0.11 | -0.94 | 0.20  | 0.37  |                         |   |   |   |    |
| C               | 242                     | 190     | -0.04                            | 0.78  | 0.48  | 0.36  | -0.50 |                         |   |   |   |    |
| O               | 71                      | 359     | -1.05                            | -0.15 | -0.51 | 0.24  | 0.22  |                         |   |   |   |    |
| E               | 342                     | 86      | -0.51                            | 0.18  | -1.03 | 0.49  | 0.45  |                         |   |   |   |    |
| ES              | 284                     | 146     | 0.03                             | 0.35  | 0.53  | 0.04  | -0.83 |                         |   |   |   |    |
| ES              | 109                     | 322     | -0.41                            | -0.62 | -1.04 | -0.28 | 0.80  |                         |   |   |   |    |
| ES              | 165                     | 266     | -0.19                            | -0.65 | -0.94 | 0.04  | 1.17  |                         |   |   |   |    |
| C               | 301                     | 129     | 0.19                             | 0.73  | 0.25  | 0.46  | -0.39 |                         |   |   |   |    |
| A               | 180                     | 250     | -0.45                            | -0.40 | 0.05  | -0.70 | -0.01 |                         |   |   |   |    |
| C/A             | 280                     | 150     | 0.51                             | -0.31 | -0.22 | 0.23  | 0.44  |                         |   |   |   |    |
| C/ES            | 302                     | 128     | 0.03                             | -0.41 | -0.65 | 0.06  | 0.56  |                         |   |   |   |    |
| C/E             | 268                     | 163     | 0.08                             | 0.51  | -0.28 | -0.09 | -0.19 |                         |   |   |   |    |
| E/A             | 162                     | 269     | 0.13                             | -0.03 | 0.30  | -0.64 | -0.26 |                         |   |   |   |    |
| A/ES            | 281                     | 150     | 0.53                             | 0.22  | 0.59  | 0.47  | -0.34 |                         |   |   |   |    |
| ES/O            | 190                     | 241     | 0.37                             | -0.37 | 0.00  | 0.35  | -0.58 |                         |   |   |   |    |
| E/A             | 252                     | 179     | -0.06                            | 0.12  | -0.89 | 0.26  | 0.12  |                         |   |   |   |    |
| O/E             | 254                     | 175     | -0.35                            | 0.06  | 0.94  | 0.27  | -0.24 |                         |   |   |   |    |
| C/O             | 269                     | 161     | -0.30                            | 0.34  | -0.40 | -0.12 | -0.04 |                         |   |   |   |    |
| C/A             | 202                     | 230     | -0.14                            | 0.39  | 0.32  | -0.78 | -0.36 |                         |   |   |   |    |
| C/ES            | 222                     | 209     | -0.05                            | -0.38 | -0.74 | -0.10 | 0.40  |                         |   |   |   |    |
| A/E             | 207                     | 224     | -0.34                            | 0.20  | 0.24  | -0.82 | -0.22 |                         |   |   |   |    |
| C/E             | 333                     | 98      | 0.08                             | 0.95  | -0.48 | 0.69  | -0.01 |                         |   |   |   |    |
| O/ES            | 331                     | 100     | -0.67                            | 0.36  | -0.84 | -0.05 | 0.40  |                         |   |   |   |    |
| C/O             | 301                     | 129     | -0.58                            | 0.69  | -0.48 | -0.14 | 0.14  |                         |   |   |   |    |
| C/ES            | 195                     | 235     | -0.21                            | -0.36 | -0.48 | 0.18  | 0.90  |                         |   |   |   |    |

| Mapped trait(s) | N respondents selecting |         | Cohen's $d$ (based on study one) |       |       |       |       | Image retained in model |   |   |   |    |
|-----------------|-------------------------|---------|----------------------------------|-------|-------|-------|-------|-------------------------|---|---|---|----|
|                 | Image 1                 | Image 2 | O                                | C     | E     | A     | N     | O                       | C | E | A | ES |
| A/E             | 269                     | 161     | 0.38                             | 0.15  | -0.91 | 0.34  | 0.41  |                         |   |   |   |    |
| O/A             | 116                     | 313     | 0.37                             | -0.19 | 0.32  | -0.68 | -0.31 |                         |   |   |   |    |
| O/A             | 144                     | 287     | 0.28                             | -0.11 | 0.84  | -0.82 | -0.36 |                         |   |   |   |    |
| E/ES            | 205                     | 225     | 0.32                             | 0.18  | 0.58  | 0.05  | -0.49 |                         |   |   |   |    |
| E/ES            | 182                     | 248     | -0.20                            | -0.14 | 0.94  | -0.16 | -0.69 |                         |   |   |   |    |
| A/ES            | 312                     | 119     | 0.18                             | 0.25  | 0.57  | 1.02  | -0.47 |                         |   |   |   |    |
| E/C             | 196                     | 235     | -0.01                            | -0.51 | 0.53  | 0.05  | -0.35 |                         |   |   |   |    |
| E/O             | 254                     | 176     | -0.65                            | 0.00  | 0.83  | -0.45 | -0.43 |                         |   |   |   |    |
| E/ES            | 207                     | 224     | 0.09                             | -0.19 | 0.83  | -0.14 | -0.35 |                         |   |   |   |    |
| E/ES            | 150                     | 281     | 0.51                             | 0.16  | 0.61  | 0.16  | -0.81 |                         |   |   |   |    |
| C/A             | 290                     | 141     | -0.04                            | -0.22 | -0.28 | 0.26  | 0.29  |                         |   |   |   |    |
| ES/A            | 204                     | 224     | 0.17                             | 0.06  | -0.56 | -0.42 | 0.42  |                         |   |   |   |    |
| O/A             | 202                     | 230     | 0.30                             | 0.00  | 0.19  | -0.44 | -0.22 |                         |   |   |   |    |
| ES/A            | 164                     | 267     | 0.23                             | -0.17 | -0.52 | -0.55 | 0.28  |                         |   |   |   |    |
| O/A             | 142                     | 290     | 0.75                             | -0.24 | 0.33  | -0.29 | -0.34 |                         |   |   |   |    |
| O/A             | 196                     | 234     | 0.35                             | -0.02 | 0.33  | -0.82 | -0.29 |                         |   |   |   |    |
| O/C             | 184                     | 245     | 0.42                             | -0.73 | -0.26 | -0.37 | 0.61  |                         |   |   |   |    |
| A/C             | 175                     | 254     | 0.27                             | -0.71 | -0.29 | -0.25 | 0.21  |                         |   |   |   |    |
| O/C             | 209                     | 222     | 0.91                             | -0.26 | 0.12  | 0.07  | -0.31 |                         |   |   |   |    |
| A/E             | 265                     | 166     | 0.36                             | -0.17 | -0.48 | 0.40  | 0.21  |                         |   |   |   |    |
| O/E             | 230                     | 202     | 0.62                             | 0.13  | -0.38 | 0.58  | 0.36  |                         |   |   |   |    |
| ES/E            | 232                     | 199     | 0.04                             | 0.05  | -1.05 | -0.29 | 0.29  |                         |   |   |   |    |

Table S2: Coefficients of the images retained by each scoring algorithm in study 2 and the trait they were designed to measure and mapped to in study 1.

| Designed to measure                     | Mapped to | Lasso coefficient |
|-----------------------------------------|-----------|-------------------|
| <b>Conscientiousness</b>                |           |                   |
| Conscientiousness: orderliness          | C         | -0.0214764        |
| Openness: artistic interests            | O         | -0.124441         |
| Openness: imagination                   | O         | 0.828066          |
| Openness: imagination                   | O         | -4.11045          |
| Openness: intellect                     | O         | 0.170194          |
| Emotional stability: self-consciousness | ES        | -0.322042         |
| Agreeableness: trust                    | A         | 0.554836          |
| Conscientiousness: dutifulness          | ES        | -1.12284          |
| Agreeableness: trust                    | A         | 0.237             |
| Emotional stability: self-consciousness | ES        | 1.59597           |
| Extraversion: excitement-seeking        | O         | 0.949553          |
| Conscientiousness: achievement-striving | ES        | -0.0994327        |
| Openness: intellect                     | C         | 0.568391          |
| <b>Openness</b>                         |           |                   |
| Conscientiousness: orderliness          | C         | 4.59555           |
| Conscientiousness: orderliness          | C         | 2.78319           |
| Conscientiousness: self-discipline      | C         | 2.38049           |
| Openness: artistic interests            | O         | 2.04351           |
| Conscientiousness: self-efficacy        | C         | 0.960278          |
| Emotional stability: vulnerability      | C         | 0.534107          |
| Emotional stability: vulnerability      | ES        | 0.519069          |
| Agreeableness: sympathy                 | A         | 0.470262          |
| Conscientiousness: orderliness          | ES        | 0.41159           |
| Agreeableness: altruism                 | E         | 0.357729          |
| Conscientiousness: achievement-striving | C         | 0.180862          |

|                                         |    |               |
|-----------------------------------------|----|---------------|
| Conscientiousness: self-efficacy        | C  | 0.180556      |
| Conscientiousness: achievement-striving | E  | 0.0312252     |
| Conscientiousness: orderliness          | C  | 0.0208352     |
| Agreeableness: sympathy                 | A  | -0.0000449482 |
| Emotional stability: vulnerability      | ES | -0.0000529599 |
| Conscientiousness: self-discipline      | C  | -0.00313537   |
| Agreeableness: modesty                  | E  | -0.141738     |
| Openness: adventurousness               | C  | -0.201648     |
| Conscientiousness: achievement-striving | C  | -0.27121      |
| Emotional stability: self-consciousness | ES | -0.298578     |
| Extraversion: gregariousness            | A  | -0.628303     |
| Conscientiousness: self-discipline      | C  | -1.54706      |
| Conscientiousness: orderliness          | C  | -2.09994      |
| Conscientiousness: self-efficacy        | C  | -2.13473      |
| Emotional stability: vulnerability      | C  | -3.39599      |

---

#### **Extraversion**

|                                          |   |          |
|------------------------------------------|---|----------|
| Emotional stability: self-consciousness  | E | 4.14099  |
| Conscientiousness: achievement- striving | O | 3.0337   |
| Extraversion: cheerfulness               | E | 2.54409  |
| Agreeableness: altruism                  | S | 2.18124  |
| Extraversion: cheerfulness               | O | 1.94808  |
| Agreeableness: sympathy                  | A | 1.57287  |
| Extraversion: excitement-seeking         | E | 1.10023  |
| Extraversion: assertiveness              | S | 1.04607  |
| Conscientiousness: orderliness           | C | 0.880609 |
| Extraversion: friendliness               | O | 0.792065 |
| Extraversion: friendliness               | C | 0.60086  |
| Conscientiousness: cautiousness          | E | 0.523434 |
| Extraversion: friendliness               | O | 0.406253 |



|                                         |   |              |
|-----------------------------------------|---|--------------|
| Conscientiousness: achievement-striving | C | 0.352042     |
| Emotional stability: vulnerability      | S | 0.141487     |
| Openness: artistic interests            | O | 0.11439      |
| Emotional stability: self-consciousness | E | 0.0905166    |
| Extraversion: friendliness              | O | 0.00120838   |
| Emotional stability: vulnerability      | S | -0.000172458 |
| Agreeableness: modesty                  | E | -0.000326526 |
| Extraversion: cheerfulness              | O | -0.0007981   |
| Emotional stability: vulnerability      | C | -0.172335    |
| Agreeableness: sympathy                 | A | -0.285091    |
| Openness: intellect                     | E | -0.300405    |
| Extraversion: friendliness              | E | -0.325052    |
| Conscientiousness: cautiousness         | O | -0.616223    |
| Emotional stability: immoderation       | S | -0.698025    |
| Emotional stability: self-consciousness | S | -0.812753    |
| Conscientiousness: cautiousness         | O | -1.55058     |
| Openness: imagination                   | E | -1.81113     |
| Extraversion: friendliness              | E | -2.14174     |
| Openness: artistic interests            | O | -2.40557     |

---

### **Agreeableness**

|                                    |   |          |
|------------------------------------|---|----------|
| Agreeableness: trust               | O | 1.96295  |
| Extraversion: assertiveness        | A | 1.6102   |
| Agreeableness: altruism            | A | 1.5622   |
| Conscientiousness: self-discipline | C | 1.33769  |
| Agreeableness: sympathy            | A | 1.15986  |
| Extraversion: gregariousness       | A | 1.09962  |
| Conscientiousness: orderliness     | C | 0.559115 |
| Agreeableness: cooperation         | O | 0.403749 |
| Agreeableness: trust               | A | 0.356484 |

|                                         |    |          |
|-----------------------------------------|----|----------|
| Agreeableness: morality                 | A  | 0.313762 |
| Agreeableness: sympathy                 | A  | 0.067053 |
| Agreeableness: cooperation              | A  | 0.018382 |
| Emotional stability: self-consciousness | ES | 0.015517 |
| Extraversion: assertiveness             | E  | -0.00476 |
| Agreeableness: sympathy                 | A  | -0.00508 |
| Agreeableness: trust                    | O  | -0.01396 |
| Agreeableness: altruism                 | O  | -0.24923 |
| Openness: adventurousness               | O  | -0.24977 |
| Agreeableness: morality                 | C  | -0.41997 |
| Conscientiousness: dutifulness          | A  | -0.85676 |
| Openness: emotionality                  | E  | -1.5204  |
| Agreeableness: cooperation              | A  | -1.66305 |
| Conscientiousness: achievement-striving | O  | -2.46459 |

---

#### **Emotional Stability**

|                                         |    |          |
|-----------------------------------------|----|----------|
| Emotional stability: vulnerability      | ES | 5.7346   |
| Emotional stability: self-consciousness | ES | 3.45296  |
| Agreeableness: altruism                 | ES | 2.99479  |
| Emotional stability: vulnerability      | ES | 2.12548  |
| Emotional stability: vulnerability      | ES | 1.5408   |
| Agreeableness: cooperation              | A  | 1.4023   |
| Emotional stability: self-consciousness | E  | 1.36492  |
| Extraversion: cheerfulness              | E  | 0.548057 |
| Conscientiousness: self-efficacy        | C  | 0.500456 |
| Extraversion: assertiveness             | ES | 0.330107 |
| Conscientiousness: cautiousness         | ES | 0.210182 |
| Emotional stability: vulnerability      | C  | 0.124217 |
| Extraversion: gregariousness            | A  | 0.118446 |
| Agreeableness: modesty                  | ES | 0.018917 |

|                                         |    |          |
|-----------------------------------------|----|----------|
| Extraversion: activity level            | E  | 0.002031 |
| Conscientiousness: cautiousness         | O  | -0.00343 |
| Emotional stability: vulnerability      | ES | -0.00728 |
| Extraversion: gregariousness            | A  | -0.03076 |
| Extraversion: gregariousness            | A  | -0.21115 |
| Conscientiousness: cautiousness         | ES | -0.22568 |
| Openness: adventurousness               | O  | -0.52122 |
| Emotional stability: vulnerability      | ES | -0.57619 |
| Extraversion: friendliness              | E  | -0.65542 |
| Openness: emotionality                  | A  | -0.95606 |
| Emotional stability: self-consciousness | ES | -1.20979 |
| Agreeableness: modesty                  | ES | -1.29436 |
| Openness: artistic interests            | O  | -1.45664 |
| Openness: emotionality                  | A  | -1.95982 |
| Conscientiousness: orderliness          | C  | -2.34316 |
| Emotional stability: vulnerability      | C  | -3.24497 |

---
